1 **Variability in fitness effects and the limitations of lineage selection**

2

3 Christopher J Graves<sup>1\*</sup> and Daniel M Weinreich<sup>1\*</sup>

4

5 <sup>1</sup> Brown University, Department of Ecology and Evolutionary Biology and Center for  
6 Computational and Molecular Biology. Providence, RI, USA

7

8 \* Corresponding authors: [christopher\\_graves@brown.edu](mailto:christopher_graves@brown.edu) and [daniel\\_weinreich@brown.edu](mailto:daniel_weinreich@brown.edu);

9 Box G-W, 80 Waterman Street

10 Brown University, Providence, RI 02912. Phone: 401-863-3937.

11

12 Running title: Lineage selection and its limitations

13

14 Keywords: Natural selection, Lineage selection, Varying environments, Group selection,

15 Inclusive fitness, Mutation rate

16

17 **Abstract**

18

19 Natural selection is sensitive not only to the effect of a trait on total number of offspring  
20 produced but also to how a trait affects an individual's entire lineage of descendants. Here we  
21 show how a large number of seemingly disparate evolutionary problems, including sex,  
22 evolvability, and cooperation, all share the property that fitness varies among members of a  
23 lineage. This feature makes it difficult to summarize the evolutionary fate of an allele based  
24 solely on its effects on individual reproduction. We show that attempts to average over this  
25 variability are often justified, but can sometimes cause misleading results. We then describe a  
26 number of intriguing new evolutionary phenomena that have emerged in studies that explicitly  
27 model the fate of alleles that influence long-term lineage dynamics. We conclude with prospects  
28 for generalizations of population genetics theory and discuss how this theory might be applied to  
29 the evolution of infectious diseases.

30

|    |                                                  |
|----|--------------------------------------------------|
| 31 | <b>Contents</b>                                  |
| 32 | I. INTRODUCTION                                  |
| 33 | II. LINEAGE INVARIANT SELECTION                  |
| 34 | III. LINEAGE SELECTION                           |
| 35 | <i>Environmental Interactions</i>                |
| 36 | <i>Genetic Interactions</i>                      |
| 37 | <i>Social Interactions</i>                       |
| 38 | IV. LIMITS TO LINEAGE SELECTION                  |
| 39 | <i>Limits of fitness averages</i>                |
| 40 | <i>Beyond fitness averages</i>                   |
| 41 | V. IMPLICATIONS FOR INFECTIOUS DISEASE EVOLUTION |
| 42 | VI. CONCLUSIONS                                  |
| 43 |                                                  |

## 44 I. Introduction

45

46 Evolution by natural selection is driven by heritable differences in the reproductive success of  
47 individuals. However, the long-term outcome of natural selection depends not only on the effects  
48 of an allele on individual bearers but also on its effects across its entire lineage of descendants  
49 (Sidebar 1). When fitness effects are invariant across a lineage, the long-term fate of an allele can  
50 be deduced in a relatively straightforward manner from its recursive effects on survival and  
51 reproduction across descendent members of the lineage. In other cases, the evolutionary success  
52 of an allele is not an obvious consequence of its effects on individuals. For example, variable  
53 environments can cause the same allele to have differing effects on fitness depending on an  
54 individuals' environmental context. Similarly, fitness effects may vary due to the presence of  
55 other alleles in the genome, which are themselves polymorphic in a population. In such cases, it  
56 is often presumed that natural selection will favor traits providing a net increase in fitness  
57 averaged across a lineage via the process of lineage selection (Eshel, 1973, Nunney, 1999b). In  
58 other words, natural selection is predicted to favor traits that are beneficial not strictly to  
59 individuals, but to genetic lineages.

60

61 The notion of lineage selection has arisen independently in a variety of evolutionary problems  
62 (Kussell and Leibler, 2005, Nunney, 1999a, Akçay and Van Cleve, 2016, Lehmann et al., 2016,  
63 Eshel, 1973, Nunney, 1999b). In general, lineage selection applies to cases where the fitness  
64 effects of an allele are variable across a genetic lineage, thereby limiting the ability to infer the  
65 long-term success of an allele based on individual fitness. A large class of evolutionary problems  
66 fit this description and they can be classified based on whether the variability across a lineage

67 arises due to environmental, genetic, or social factors. We outline examples of each in Table 1  
68 and describe them in more detail in the main text. Each source of variation has largely been  
69 discussed within its own body of literature, where lineage selection or equivalent concepts are  
70 used to describe a distinct set of adaptations, often with distinct terminology. Despite some  
71 obvious similarities, there have been few attempts at synthesizing what is known in each of these  
72 cases into a formal quantitative theory of lineage selection.

73  
74 A common feature of lineage selection is the notion that variability in fitness across a lineage can  
75 be averaged to define a quantity representing an “effective” fitness. We discuss the equivalence  
76 of different approaches to averaging across a lineage below – which include familiar notions  
77 such as geometric mean fitness and inclusive fitness. Generally, such averages shift the focus  
78 from individuals to lineages and suggest that natural selection will favor traits that increase the  
79 long-term average growth of a genetic lineage. However, natural selection is myopic in nature-  
80 acting to increase the frequency of traits that confer an immediate advantage without regard to  
81 their future utility. This shortsightedness can have dramatic consequences, particularly if it  
82 results in the permanent extinction of an allele prior to it realizing any long-term benefit. Indeed,  
83 the notion that natural selection will act most strongly on alleles that confer a short-term  
84 advantage was championed by Maynard Smith (1964) and Williams (1966) in their now famous  
85 critique of group selection, and is still in use (Sniegowski and Murphy, 2006, Lynch, 2007).  
86 When does natural selection favor traits that confer a long-term benefit to a lineage and when  
87 does shortsighted evolution limit this ability?

88

89 After briefly summarizing results from classical, lineage-invariant theory that successfully  
90 relates individual fitness to a lineage's eventual fate, we discuss a diversity of examples of  
91 lineage selection and emphasize the shared theme of variability in fitness across a lineage. We  
92 illustrate the shortcomings of averaging variability across a lineage in the context of finite  
93 populations, in which alleles that are beneficial in the long-term are nevertheless vulnerable to  
94 extinction. Consequently, shortsighted evolution in finite populations can limit the ability of  
95 natural selection to optimize even these measures of fitness. Finally, we discuss other  
96 counterintuitive results that emerge in examples where lineage variability is modeled explicitly,  
97 which provide more general insights into underappreciated features the evolutionary process. We  
98 conclude by highlighting implications for the evolution of infectious diseases and directions for  
99 future work.

100

## 101 **II. Lineage Invariant Selection**

102

103 Evolutionary biologists are fundamentally concerned with understanding the outcome of natural  
104 selection on traits that influence the fate of an individuals' descendent lineage. Before discussing  
105 the realm of lineage selection – where fitness varies among members of a lineage – we will first  
106 consider the case where fitness effects are invariant across a lineage. Our emphasis throughout  
107 will be on the field of population genetics, which has a rich tradition of analyzing dynamical  
108 models that combine various evolutionary forces including natural selection, genetic drift, and  
109 mutation. This emphasis reflects not only our own expertise but also the fact that such dynamical  
110 treatments of evolution provide a comprehensive analysis of a lineage – starting from its  
111 origination in the population and ending with its ultimate fixation or extinction. We will

112 therefore be decidedly brief in our overview of other aspects of evolutionary theory, which  
113 include techniques such as game theory and quantitative genetics that capture effects over shorter  
114 intervals of the evolutionary process.

115

116 Consider an allele that influences the expected number of surviving offspring produced over the  
117 lifetime of its carriers. Formally, we allow the precise number of offspring produced by any  
118 particular individual in this lineage to be a Poisson random variable drawn independently from  
119 an identical distribution, with mean defined as the Wrightian fitness,  $w$ . This concept of fitness  
120 articulates well with the Darwinian notion of fitness as lifetime reproductive success. The most  
121 fundamental consideration regarding the fate of an allele by natural selection is to consider  
122 whether the allele influences this measure of fitness relative to the resident “wild type” in the  
123 population. In population genetics, this fitness effect is most often denoted with the selection  
124 coefficient,  $s$ , defined as the proportional change in expected number of offspring relative to the  
125 wild-type:  $s \equiv w_{\text{mut}}/w_{\text{wt}} - 1$ .

126

127 Now consider a population with constant size,  $N$ . Since the number of surviving offspring born  
128 to an individual is a random variable, we allow for random fluctuations in the number of  
129 individuals carrying an allele as the basis for genetic drift. Assuming that generations are discrete  
130 and non-overlapping we can approximate the allele frequency dynamics using the Wright-Fisher  
131 model. We emphasize that the Wright-Fisher process and related models capture the interplay  
132 between natural selection and genetic drift in finite populations by incorporating stochasticity in  
133 the number of surviving offspring born to each individual. However, they assume that the

134 distribution in that number remains constant across a lineage, and we refer to this assumption as  
135 lineage invariant selection (Figure 1A).

136

137 Given this framework, we can obtain solutions for a number of quantities pertaining to the fate of  
138 a mutant allele based on its selection coefficient,  $s$ . Of particular interest given our concern with  
139 the ultimate fate of a lineage is the ultimate probability that an allele displaces all alternatives in  
140 the population, known as the probability of fixation,  $P_{\text{fix}}$ . Kimura (1962) found this quantity for a  
141 mutation starting at frequency  $x_0$ , in a haploid, randomly mating population of size  $N$ , using a  
142 continuous diffusion approximation of the Wright-Fisher process:

$$143 \quad P_{\text{fix}}(N, s, x_0) = \frac{1 - e^{-Nsx_0}}{1 - e^{-Ns}}. \quad (1)$$

144 This result highlights many of the key features of classical population genetics theory. Focusing  
145 on the case where an allele starts from a single mutation in the population, we will assume that  $x_0$   
146 =  $1/N$ . Solving for the limit as  $s$  approaches zero leads to  $P_{\text{fix}} = 1/N$ . This defines the neutral  
147 expectation that the probability of fixation of an allele is simply equal to its starting frequency.  
148 Now consider a beneficial mutation,  $s > 0$ . Here,  $P_{\text{fix}} > 1/N$ , but only asymptotically approaches  
149 1.0 as  $s$  grows, even as population size  $N$  tends to infinity (Haldane, 1927). In other words,  
150 fixation of even a strongly beneficial is not assured due to the fact genetic drift dominates allele  
151 frequency dynamics until there are roughly  $1/s$  copies in the population. This effect is worsened  
152 in small populations since  $1/s$  copies may be an appreciable fraction of the population. Thus as  $s$   
153 or  $N$  get small,  $1/s$  approaches  $N$  and genetic drift comes to dominate selection. This result –  
154 known as the drift barrier – implies that mutations are effectively neutral from the standpoint of  
155 natural selection, unless  $s > 1/N$ . Finally, and somewhat less intuitively, Kimura’s formula also  
156 shows that even deleterious mutations ( $s < 0$ ), can have a nonzero fixation probability. Here



157 again, genetic drift can overwhelm natural selection in populations roughly no larger than  $1/|s|$   
158 individuals.

159

### 160 **III. Lineage Selection**

161

162 Under the assumption that an allele exerts a constant, lineage invariant, effect on fitness,

163 Equation 1 demonstrates that a mutant's fitness effect is sufficient predict the fate of its lineage.

164 We now turn to cases of lineage selection, where variability in the fitness effects of an allele can

165 cause this result to fail. Lineage selection emerges under more realistic biological scenarios,

166 where alleles do not act alone to influence fitness but interact with different environmental,

167 genetic, or social factors (Table 1, Figure 1). Consequently, the number of offspring produced by

168 individuals in a lineage may not be drawn from any fixed distribution, violating the assumption

169 of lineage invariance underlying Equation 1. We emphasize that such variability in offspring

170 number is beyond that captured in models like Wright-Fisher, which require the distribution of

171 offspring number to be fixed. Our goal in this section is to highlight some of the relevant

172 examples of variability in fitness of an allele represented by the three classes in Table 1, and to

173 build some intuition for how they have been handled in the literature. We also seek to show that

174 adaptations associated with each example depend uniquely on the effects of an allele on the fate

175 of a lineage rather than on individual success.

176

#### 177 *Environmental interactions*

178

179 Natural environments are inherently variable and therefore present an obvious challenge to the

180 assumption that an allele will have the same effect on fitness for all members of a lineage.

181 Variation in the environment over time will cause contemporary members of a lineage to  
182 experience the same distribution of fitness values, but this distribution now depends on time  
183 (Figure 1B). Contrastingly, under spatial variation in the environment contemporary members  
184 will experience fitness effects that depend on the interaction between their shared allele and the  
185 local environment they encounter. This implies that no single distribution in offspring number  
186 will be generally applicable (e.g., Gillespie, 1974). In either case, if environmental change is so  
187 rapid that individuals encounter a succession of different environments in their lifetime, then  
188 fitness can be described as a lifetime average of total survival and reproduction (Levins, 1968).  
189 We will therefore focus on the more interesting case where environments vary on a timescale  
190 greater than the generation time of the organism.

191  
192 The greatest progress has been made in models of temporally varying environments, in which  
193 case the selection coefficient  $s$  is no longer a constant, but a time-dependent quantity,  $s(t)$ .  
194 Formal analysis typically requires specifying a particular form of  $s(t)$  at the expense of generality  
195 across all types of variation. It is commonly assumed that environments are randomly drawn  
196 from a fixed distribution (Lewontin and Cohen, 1969, Dempster, 1955, Gillespie, 1973, Kussell  
197 and Leibler, 2005). Under these assumptions, a diverse set of models can be integrated based on  
198 how variation in fitness correlates within and between members of two competing lineages  
199 (Frank and Slatkin, 1990). We note, however, that such an approach is limited to deriving the  
200 average direction of change in allele frequency rather than explicitly modeling lineage dynamics.  
201 Another consequence of assuming random environmental change is that natural selection will  
202 favor alleles that increase the long-term growth rate of a lineage, averaged over all environments  
203 (Lewontin and Cohen, 1969, Gillespie, 1973, Stearns, 2000, Kussell and Leibler, 2005,

204 Dempster, 1955). Formally, this corresponds to an increase in the geometric mean fitness, or  
205 equivalently, the mean intrinsic growth rate (Sidebar 2), and is generalizable to other forms of  
206  $s(t)$  (Cvijović et al., 2015).

207  
208 The principle that natural selection in variable environments acts to increase geometric mean  
209 fitness is one of the key theoretical results on variable environments and it is presumed to  
210 underlie numerous adaptations. These include strategies like developmental and phenotypic  
211 plasticity that allow adaptive phenotypic responses to environmental conditions that may not be  
212 encountered by all individuals (Meyers and Bull, 2002, Via et al., 1995). More notable is the  
213 evolution of bet-hedging traits in which an allele causes the exaggeration of phenotypic noise  
214 among members of a lineage, thereby allowing a single genotype to spread environmental risk  
215 among different phenotypes that are suited to different environments (Philippi and Seger, 1989,  
216 Fraser and Kaern, 2009, Gillespie, 1974, Kussell and Leibler, 2005). Such a strategy is inherently  
217 dependent on lineage selection, since individuals will experience differing fitness values  
218 depending on their phenotype and the environment they encounter. By spreading the risk of  
219 fitness losses under future environmental uncertainty across members of a lineage, bet-hedging  
220 helps to ensure survival and reproduction across the lineage as a whole, regardless of the  
221 environment. Examples of adaptive bet-hedging strategies have been noted in plants (Gremer  
222 and Venable, 2014, Clauss and Venable, 2000, Childs et al., 2010), insects (Hopper, 1999, Menu  
223 et al., 2000), and microbes (Balaban et al., 2004, Jones and Lennon, 2010, Levy et al., 2012).

224  
225 *Genetic interactions*

226

227 Alleles don't influence fitness alone but do so as part of an integrated genome. The genetic  
228 background of an allele is therefore another important source of variability in fitness across a  
229 lineage. Perhaps the most obvious example is that of epistasis (Phillips, 1998), in which the  
230 fitness effect of a mutation depends on its genetic context. Empirical evidence suggests that  
231 epistasis among alleles is widespread (Costanzo et al., 2016, Wang et al., 2014, Weinreich et al.,  
232 2013, Kryazhimskiy et al., 2014, Mossman et al., 2016) and therefore provides an important  
233 source of variability in the fitness effects of an allele, particularly in sexual populations. Similar  
234 variation in fitness can occur in asexual populations due to secondary mutations that arise on the  
235 genetic background of an allele as it spreads. This effect is most important in large populations  
236 or under high mutation rates. Such conditions lead more generally to a condition of clonal  
237 interference (Gerrish and Lenski, 1998), in which multiple asexual lineages carry competing  
238 beneficial mutations, thereby interfering with one another's fixation. The fate of a lineage under  
239 clonal interference cannot be decided by the selection coefficient of a single allele, but instead  
240 depends on the process of successive mutations accumulating along a series of competing  
241 asexual lineages (Lang et al., 2013, Desai and Fisher, 2007). Indeed, this presents a major hurdle  
242 to adapting populations, since the lack of recombination implies strict genetic linkage among  
243 mutations that occur on the same background. This lack of recombination can also lead to  
244 Muller's ratchet (Haigh, 1978, Muller, 1964), in which the serial fixation of deleterious  
245 mutations by genetic drift can cause fitness to erode along an asexual lineage.

246

247 The constraints on asexual adaptation due to clonal interference and Muller's ratchet provide  
248 strong arguments for why so many organismal life cycles include periods of recombination or  
249 sexual reproduction. Indeed, numerous theories for the evolution of sex have been put forth,

250 mostly relying on arguments for why sex is beneficial in terms of the long-term evolutionary  
251 success of a lineage (Nunney, 1999b). This is because sex is inherently costly to individuals, who  
252 must invest time and energy in mating and further invest resources into the production of males,  
253 which are not capable of independent reproduction (Maynard Smith, 1978). These costs could,  
254 however, be balanced by the fact that sex appears to increase the long-term adaptive potential of  
255 lineages (Nunney, 1989, Nunney, 1999b). For example, under certain conditions of epistasis,  
256 recombination can accelerate both the pace of adaptation (Eshel and Feldman, 1970) and the  
257 ability of populations to purge deleterious mutations and fend off Muller's ratchet (Kondrashov,  
258 1988). Furthermore, sexual reproduction can increase rates of adaptation by allowing beneficial  
259 mutations that arise on different backgrounds to be combined into a single genotype, thereby  
260 limiting the constraints imposed by clonal interference (McDonald et al., 2016, Cooper, 2007).  
261 Finally, the red-queen hypothesis (Van Valen, 1973, Hamilton et al., 1990), asserts that the  
262 constant creation of new genotypes under recombination can be a strategy allowing organisms to  
263 more readily compete in a co-evolutionary arms race with parasites. Indeed, sex is likely to have  
264 evolved for a combination of reasons and empirical observations support many of the hypotheses  
265 that have been put forth (Colegrave, 2002, Goddard et al., 2005, Cooper, 2007, McDonald et al.,  
266 2016, Morran et al., 2011).

267

268 Sex and recombination are not the only processes that increase rates of adaptation. There has  
269 been substantial recent attention on whether natural selection can act more generally on the  
270 ability of populations to adapt, or its evolvability. Selection for evolvability is contentious, since  
271 the ability to evolve is a feature of populations and would therefore appear to require a form of  
272 group selection operating on biological populations (Sniegowski and Murphy, 2006, Lynch,

273 2007, Pigliucci, 2008). However, traits that increase evolvability could also arise by the process  
274 of lineage selection, with lineages being more likely to persist over longer evolutionary periods if  
275 they are able to adapt to future conditions (Eshel, 1973). Since mutation is the raw material  
276 required for adaptation, there has been a great deal of attention paid to the evolution of alleles  
277 which influence the mutation rate – known as mutation rate modifiers (Sniegowski et al., 2000,  
278 Denamur and Matic, 2006). Mutation rate modifiers have been observed in microbial populations  
279 both in the lab (Sniegowski et al., 1997) and in nature (LeClerc et al., 1996, Matic et al., 1997).  
280 The fate of such “mutator” alleles is intriguing, since they often arise without a direct effect on  
281 fitness themselves (Chao and Cox, 1983, Sniegowski et al., 1997). In asexual populations,  
282 mutators are still physically linked to the mutations they produce and can thereby influence the  
283 statistical properties and long-term fate of lineages (Figure 1C). In such scenarios, evolvability  
284 arises as a by-product of indirect selection and genetic hitchhiking of mutators (Sniegowski and  
285 Murphy, 2006). However, there are notable exceptions in which selection on evolvability may be  
286 more direct. This appears to be the case in pathogens, where lineage selection has favored  
287 elevated mutation rates in antigens to increase the capacity to adapt to a dynamic vertebrate  
288 immune response (Moxon et al., 1994, Graves et al., 2013).

289

### 290 *Social interactions*

291

292 Fitness can be influenced not only by environmental and genetic factors but also by interactions  
293 with other conspecifics. These interactions can create a type of variability across a lineage  
294 known as frequency dependent selection, where the fitness effects of an allele are dependent on  
295 the frequency of the allele in the population. Frequency dependence is conveniently analyzed in

296 the context of evolutionary game theory (Sidebar 3), which allows one to consider the ability of  
297 an initially rare allele to invade a population fixed for a wild-type allele (Maynard Smith, 1982,  
298 Maynard Smith and Price, 1973). This approach provides a generalization of the concept of a  
299 selection coefficient to instances where fitness cannot be wholly represented by a constant value.  
300 A classic example of frequency-dependent selection arises when considering cooperative traits.  
301 Here, cooperative acts incur a cost to individuals and are therefore susceptible to invasion by  
302 selfish “cheater” strategies that avoid the cost of cooperating while still reaping the benefit.  
303 Cheaters are typically beneficial when rare, since their fitness advantage requires interactions  
304 with other cooperators. Despite the inherent susceptibility to cheaters, cooperation is common in  
305 nature and is presumed to underlie underlying major transitions in evolutionary history, such as  
306 the evolution of multicellularity (Szathmary and Maynard Smith, 1995). The mechanisms  
307 promoting the evolution and maintenance of cooperation are therefore of long-standing interest  
308 to biologists.

309  
310 Significant theoretical progress on the evolution of cooperation arose with the formulation of  
311 inclusive fitness theory. Hamilton (1964) showed that genes controlling cooperation may be  
312 beneficial on average so long as the beneficiary of cooperative actions are kin, which are likely  
313 to share the genes controlling cooperation by common descent. The key realization of this theory  
314 is that cooperative acts need not directly increase the reproductive success of individual bearers,  
315 but instead must increase the average effect of a gene across the lineage of cooperators (Akçay  
316 and Van Cleve, 2016). Cooperation can also be stable under cases of multi-level selection  
317 (Traulsen and Nowak, 2006, Luo, 2014, Simon et al., 2013). The formation and dissolution of  
318 new groups is itself a reproductive process and the long-term fate of a lineage is therefore

319 sensitive to the influence of an allele on group-level reproduction (Figure 1D). A well-known  
320 example is infectious diseases, discussed below, in which individual cells or viral particles  
321 replicate within hosts but also spread among hosts to establish new infections.

322

323 There is ample empirical evidence for the stability of cooperative traits in nature due to lineage  
324 selection. For example, a large number of studies have shown how cooperation can prevail  
325 through the action of group selection and kin selection (Velicer et al., 2000, Koschwanez et al.,  
326 2013, Gore et al., 2009, Turner and Chao, 1999, Rainey and Rainey, 2003). Perhaps a more  
327 intriguing result of lineage selection is the evolution of “policing” phenotypes that function to  
328 reduce the potential benefits to cheaters (Frank, 1995, Nunney, 1999b, Travisano and Velicer,  
329 2004). For example, in social insects, reproduction by the worker caste constitutes a selfish trait  
330 that can undermine colony reproductive interests. To prevent selfish reproduction among  
331 workers, social insects have evolved anti-cheater strategies, where colony members will  
332 systematically destroy eggs laid by workers (Ratnieks and Visscher, 1989). Tumor suppressor  
333 genes of multi-cellular organisms perform a similar function by recognizing and destroying cells  
334 that violate normal growth regulation and thereby preventing outgrowths of genetically selfish  
335 cancer cells (Nunney, 1999a). Finally, group selection dynamics can even result in Simpson’s  
336 paradox (Blyth, 1972) in which the overall frequency of cooperators increases despite their  
337 systematic tendency to decrease within groups (Chuang et al., 2009). The fact that a trait can  
338 spread even as it selects against in every individual carrier shows the potential for lineage  
339 selection to prevail over selection on individuals.

340

341 **IV. Limitations to lineage selection**



342

343 *Limitations of fitness averages*

344

345 A central theme in many of the treatments of lineage selection described above is that fitness  
346 differences can be averaged across a lineage using concepts like geometric mean fitness and  
347 inclusive fitness. These extended fitness averages provide a convenient way to determine if an  
348 allele has a positive or negative affect on a lineage. We also note the equivalency between these  
349 concepts and several related averages. For example, pathogens are widely assumed to maximize  
350 their long-term transmission success,  $R_0$  (Anderson and May, 1982, Alizon et al., 2009).

351 Similarly, Lyapunov exponents are sometimes used to derive long-term growth rates in variable  
352 environments (Kussell and Leibler, 2005) and the concept of invasion fitness in evolutionary  
353 game theory (Sidebar 3) indicates whether natural selection tends to favor a trait under frequency  
354 dependence (Lehmann et al., 2016). Similar averages have been used to deal with variation in an  
355 allele's genetic background (Livnat and Papadimitriou, 2016, Falconer, 1994). In general,  
356 averages across the variability in reproductive success are meant to allow one to directly define a  
357 selection coefficient in order to identify which allele increases fitness. An even more ambitious  
358 goal would be if Equation 1 could be salvaged altogether, as is the case under scenarios of rapid  
359 environmental change (Cvijović et al., 2015).

360

361 Unfortunately, there are fundamental problems with the use of these averages that can preclude  
362 natural selection from maximizing fitness averages. Specifically, shortsighted evolution can  
363 drive alleles permanently extinct, regardless of their long-term benefit to a lineage. This is most  
364 readily seen in the case of a changing environment (Figure 2), where it has been noted in several

365 contexts (Masel et al., 2007, King and Masel, 2007, Gerland and Hwa, 2009, Cvijović et al.,  
366 2015). Assume that a mutation arises in an environment in which it is beneficial and that the  
367 environment is constant for  $\tau$  generations. Provided it survives genetic drift, the allele will  
368 increase in frequency following a logistic function and reach a frequency of one in  
369 approximately  $2 \cdot \ln(Ns)/s$  generations (Desai and Fisher, 2007). Thus, if  $\tau \gg 2 \cdot \ln(Ns)/s$ , then  
370 alleles will arise and fix all in the same environment (Cvijović et al., 2015). This provides a  
371 straightforward threshold, beyond which natural selection is blind to the allele's long-term  
372 benefit. Of course, this threshold is derived under the assumption of a well-mixed population of  
373 constant size, and other factors such as demographic changes and population subdivision could  
374 substantially extend this upper bound. Still, these considerations demonstrate an inherent time-  
375 constraint imposed by evolution in finite populations, which only disappear as a mathematical  
376 artifact in infinite populations (Figure 2C).

377

378 Similar limitations can be seen whenever the timescale of change in the fitness effects of an  
379 allele are greater than the time needed for natural selection to fix alleles conferring a short-term  
380 advantage. For example, models of multi-level selection become dominated by short-sighted  
381 evolution of selfish phenotypes whenever group-level reproductive events are rare (Luo 2014,  
382 Doebeli). This breakdown in favor of shortsighted evolution is analogous to that in variable  
383 environments (Figure 2B) and can be understood by considering the relative effects of individual  
384 and group selection on changes to allele frequency. Natural selection takes about  $s$  generations to  
385 double the frequency of a selfish trait within groups, where  $s$  denotes the within-group benefit of  
386 a selfish trait. On the other hand, increased rates of group reproduction in groups of non-selfish  
387 individuals will double the frequency of a cooperative trait after approximately  $w/r$  generations,

388 where  $r$  is the group-level selection coefficient and  $w$  is the number of individual generations  
389 between group reproductive events. This heuristic reasoning implies that short-sighted evolution  
390 in favor of a selfish trait will dominate allele frequency changes and preclude the evolution of  
391 cooperation whenever  $s \gg wr$ , which very closely matches results derived by formal analysis  
392 (Luo, 2014).

393

394 *Beyond fitness averages*

395

396 In addition to the role of extinction in tipping the outcome of selection toward shortsighted traits,  
397 studies explicitly modeling variability across a lineage have yielded a number of results that are  
398 not readily captured by Equation 1. Recently, Cvijović et al. (2015) examined the case of a  
399 periodic environment that alternates between two states. An allele that is favored in one  
400 environment but disfavored in the next can follow unintuitive dynamics, particularly when large  
401 changes in allele frequency occur within environmental epochs. In the classic, lineage invariant  
402 scenario discussed above, fixation of a neutral allele from a single starting copy requires  
403 traversing from a starting frequency of  $1/N$  to a frequency of 1 by the action of genetic drift  
404 alone. In contrast, mutations in a fluctuating environment experience selective pressures  
405 continually, albeit of varying signs and intensities. This means that alleles can be driven to very  
406 high or very low frequencies by natural selection and then achieve fixation or loss due to genetic  
407 drift with far greater probability than predicted by Equation 1. This effect can cause the fixation  
408 probability of an allele to increase well beyond the neutral expectation of  $1/N$ , even when alleles  
409 are neutral or deleterious on average. Furthermore, the drift barrier is substantially greater  
410 compared to that in a constant environment, which implies that natural selection also becomes

411 less efficient at distinguishing beneficial and deleterious mutations. Finally, as populations  
412 become smaller or swings in frequency more dramatic, fixation becomes independent of the  
413 average selection coefficient, creating conditions where the fixation probability is not even a  
414 monotonically increasing function of long-term fitness.

415

416 Another intriguing result emerges when the mean reproductive success across a lineage is held  
417 constant but its variance is altered. For example, Gillespie (1974) considered a model meant to  
418 capture spatial variation in the environment by relaxing the assumption of a Poisson-distributed

419 number of offspring. Gillespie found that the natural way to quantify fitness is  $w = \mu - \frac{1}{N}\sigma^2$

420 where  $\mu$  is the mean number of offspring,  $\sigma^2$  is its variance, and  $N$  is the population size. A

421 striking feature of this model is the appearance of population size in the definition of fitness,

422 which suggests that the same allele can be favored or disfavored depending solely on the

423 population size. This same sort of dependence on population size arises in a model of fluctuating

424 environments (Takahata et al., 1975), as well as in mutators (Wylie et al., 2009, André and

425 Godelle, 2006, Raynes et al., 2014). We emphasize that the population size dependence in the

426 above examples is distinct from that of Equation 1, where population size influences the

427 efficiency of natural selection but does affect its sign. Instead, variability in fitness across a

428 lineage makes it possible that a subset of individuals will experience strong selective pressures

429 that are not dominated by drift, even in small populations. This implies that genetic drift and

430 natural selection do not, in general, scale according the relationship in Equation 1.

431

432 Perhaps the most intriguing feature of lineage variability is the possibility that the fate of an

433 allele may not always be reducible to a selection coefficient at all. This is certainly the case for

434 the evolution of mutation rate modifiers, where the succession of *de novo* beneficial and  
435 deleterious mutations results not only in variability in the distribution of offspring numbers  
436 across a lineage, but also in temporal autocorrelation in this distribution among the resulting sub-  
437 lineages (Figure 2C). Consequently, the offspring distribution is not only changing through time,  
438 but is also inherently linked to the underlying lineage dynamics. This implies that one is unable  
439 to define any selection coefficient for a mutator that predicts  $P_{\text{fix}}$ , but must instead derive  $P_{\text{fix}}$   
440 directly under models that explicitly capture the dynamics of secondary mutations and clonal  
441 interference (Good and Desai, 2016). Although one could then use  $P_{\text{fix}}$  to retrospectively define  
442 an effective coefficient using Equation 1 (Wylie et al., 2009), it seems that one cannot generally  
443 define such a selection coefficient *a priori*. It is conceivable that similar properties might emerge  
444 in the context of variable environments and other examples of lineage selection, though such  
445 results have not been described to our knowledge.

446

## 447 **V. Implications for infectious disease evolution**

448

449 One of the most promising applications for theoretical developments related to variability in  
450 fitness across a lineage is in predicting and controlling the evolution of infectious diseases.  
451 Medically important traits such as pathogen virulence and drug resistance evolve rapidly and  
452 there has been considerable interest in the development of evolution-proof vaccines and  
453 antibiotics (Day and Read, 2016, Huijben et al., 2013, Read et al., 2011, Allen et al., 2014).  
454 Pathogen lineages experience a variety of extrinsic environmental changes including a dynamic  
455 immune response, a diverse set of tissues and hosts, and varying exposure to drugs. Additionally,  
456 since reproduction occurs both within and between hosts, multi-level selection can create

457 conflicting selective pressures operating over different timescales (Levin and Bull, 1994,  
458 Kawashima et al., 2009). Finally, the dynamic immune response targeting antigenic epitopes has  
459 resulted in the selective pressures favoring mutator genes capable of immune evasion and  
460 antigenic evolvability (Deitsch et al., 2009, Graves et al., 2013, Moxon et al., 1994). Variability  
461 across lineages therefore appears to be the rule rather than the exception in infectious disease  
462 evolution.

463

464 Predicting pathogen evolution and designing evolution-proof drugs will be greatly aided by  
465 models that combine the various selective pressures operating at different levels and timescales  
466 during the pathogen life-cycle. Traditional models have generally assumed that natural selection  
467 will favor traits that increase the long-term epidemiological success. For example, virulence is  
468 widely regarded as an adaptation to balance the increased rate of transmission by more  
469 aggressive diseases with the reduced duration of infection caused by host mortality or immune  
470 selection (Anderson and May, 1982, Alizon et al., 2009, Alizon and Michalakis, 2015, Bull and  
471 Lauring, 2014). However, the assumption that natural selection will maximize transmission  
472 success is analogous to selection maximizing other long-term measures of lineage success, like  
473 geometric mean fitness, and is therefore sensitive to the limitations discussed above (Figure 2).  
474 Specifically, shortsighted evolutionary processes occurring within-hosts may act as a barrier for  
475 traits that could increase long-term transmission success (Levin and Bull, 1994; Sidebar 2).  
476 Indeed, models that include mutation or competition between strains within-hosts or other  
477 ecological dynamics have demonstrated the inability of selection to maximize transmission  
478 success (Bonhoeffer and Nowak, 1994, Day, 2003, Alizon et al., 2013).

479

480 There is broad support for the prediction that shortsighted evolution and lineage selection can  
481 influence the evolution of infectious diseases. For example, empirical studies in HIV (Alizon and  
482 Fraser, 2013) and enteric bacteria (Giraud et al., 2001) show how short-sighted evolution can  
483 dominate patterns of evolution and lead to reductions in long-term transmission success. In  
484 *Salmonella enterica*, lineage selection appears to have favored a strategy to preclude shortsighted  
485 evolution and stabilize long-term infectivity (Diard et al., 2013, Frank, 2013, Mulder and  
486 Coombes, 2013). Further theoretical progress on the role of lineage selection in pathogens could  
487 come from models that explicitly combine mechanistic within-host processes with long-term  
488 epidemiological dynamics (Coombs et al., 2007, Gilchrist and Coombs, 2006, Day and Gandon,  
489 2007, Mideo et al., 2008). In addition, new experimental technologies such as lineage tracking of  
490 pathogens using barcode deep-sequencing (Blundell and Levy, 2014, Levy et al., 2015) offer  
491 exciting opportunities to measure selective pressures occurring within-hosts and integrate them  
492 with more traditional epidemiological data.

493

## 494 VI. Conclusions

495

496 Evolutionary biologists have traditionally assumed that natural selection acts to favor traits that  
497 increase individual survival and reproductive success. However, individual fitness cannot always  
498 capture the long-term evolutionary fate of an allele when variability in fitness effects arise due to  
499 environmental, genetic or social interactions (Table 1, Figure 1). Lineage selection seeks to  
500 address this variability by averaging fitness across the various environmental, genetic, and social  
501 contexts an allele encounters. However, this approach can fail in finite populations where an  
502 allele's predicted fate can be interrupted by fixation or extinction due to shortsighted evolution

503 (Figure 2B). Furthermore, genetic drift and natural selection interact in unexpected ways when  
504 variability in fitness effects occurs over a comparable timescale to allele frequency (Cvijović et  
505 al. 2015, Figure 2D). More strikingly, examples from studies of mutation rate modifiers indicate  
506 that there may be no way to summarize the direction of natural selection on an allele without  
507 simply modeling its long-term lineage dynamics. Taken together, these findings may have  
508 particular relevance for the study of infectious pathogens, where alleles are likely to experience  
509 variability due to a combination of environmental, genetic, and social interactions.

510

511 Variability in the fitness effects of an allele challenge the conventional premise of population  
512 genetics which assumes that individual offspring number can be drawn from a fixed distribution  
513 for all members of a lineage (Figure 1). Cases where the typical assumption of a Poisson  
514 offspring distribution have been relaxed (Gillespie, 1974) have yielded intriguing new  
515 evolutionary properties such as dependence on both the mean and variance in fitness effects and  
516 a critical effect of population size in determining whether an allele is beneficial. Other examples  
517 allow properties of the offspring distribution to vary in time, but still assume that the form of the  
518 distribution is fixed (Cvijović et al., 2015). In other cases, it appears that allele frequency  
519 dynamics cannot always be reduced to one of independent draws from any offspring distribution,  
520 time-dependent or not. This effect is most recognizable in mutators, where the offspring  
521 distribution changes in a manner that is inseparable from the underlying lineage dynamics caused  
522 by secondary mutations and selection on sub-lineages (Figure 1C). Thus, while theoretical  
523 progress has been in understanding processes where the offspring distribution takes on more  
524 general forms (Cannings, 1974, Der et al., 2012, Der et al., 2011), we are still far from a



525 population genetics theory with which to predict the fate of an allele in general scenarios of  
526 lineage selection.

527

528 Lineage variability also highlights the need for caution when interpreting the adaptive  
529 significance of biological traits in nature. Emphasis has often been placed on individual fitness  
530 effects at the expense of neglecting the ability of selection to favor traits that have longer term  
531 consequences on the fate of an allele (Williams, 1966). Indeed, there are a plurality of definitions  
532 of fitness (Orr, 2009) with each generalizing the concept of fitness under a particular source of  
533 lineage variability but none that appear sufficiently general to account for all cases of lineages  
534 selection. Caution is warranted when considering traits in the context of their long-term effects  
535 on a lineage, since such traits are inherently susceptible to shortsighted evolution (Figure 2).  
536 Thus, while it is often safe to assume that selection will favor traits on the basis of extended  
537 fitness metrics, it is also important to consider the inherent limitations in the ability of natural  
538 selection to optimize any measure of fitness.

539

540 **Literature cited**

541

542

543 Akçay, E. & Van Cleve, J. 2016. There is no fitness but fitness, and the lineage is its bearer.

544 *Philos. Trans. R. Soc. Lond., B, Biol. Sci.*, 371:20150085.

545

546 Alizon, S., De Roode, J. C. & Michalakis, Y. 2013. Multiple infections and the evolution of

547 virulence. *Ecol. Lett.*, 16:556-567.

548

549 Alizon, S. & Fraser, C. 2013. Within-host and between-host evolutionary rates across the HIV-1

550 genome. *Retrovirology*, 10:49.

551

552 Alizon, S., Hurford, A., Mideo, N. & Van Baalen, M. 2009. Virulence evolution and the trade-

553 off hypothesis: History, current state of affairs and the future. *J. Evol. Biol.*, 22:245-59.

554

555 Alizon, S. & Michalakis, Y. 2015. Adaptive virulence evolution: The good old fitness-based

556 approach. *Trends Ecol. Evol.*, 30:248-54.

557

558 Allen, R. C., Popat, R., Diggle, S. P. & Brown, S. P. 2014. Targeting virulence: Can we make

559 evolution-proof drugs? *Nature Rev. Microbiol.*, 12:300-308.

560

561 Anderson, R. M. & May, R. M. 1982. Coevolution of hosts and parasites. *Parasitology*, 85 (Pt

562 2):411-26.

563

564 André, J.-B. & Godelle, B. 2006. The evolution of mutation rate in finite asexual populations.

565 *Genetics*, 172:611-626.

566

567 Balaban, N. Q., Merrin, J., Chait, R., Kowalik, L. & Leibler, S. 2004. Bacterial persistence as a

568 phenotypic switch. *Science*, 305:1622-5.

569

570 Blundell, J. R. & Levy, S. F. 2014. Beyond genome sequencing: Lineage tracking with barcodes

571 to study the dynamics of evolution, infection, and cancer. *Genomics*, 104:417-430.

572

573 Blyth, C. R. 1972. On Simpson's paradox and the sure-thing principle. *J. Amer. Statist. Assoc.*,

574 67:364-366.

575

576 Bonhoeffer, S. & Nowak, M. A. 1994. Mutation and the evolution of virulence. *Proc. R. Soc. B*,

577 258:133-140.

578

579 Bull, J. J. & Luring, A. S. 2014. Theory and empiricism in virulence evolution. *PLoS Pathog.*,

580 10:e1004387.

581

582 Cannings, C. 1974. The latent roots of certain markov chains arising in genetics: A new

583 approach, i. Haploid models. *Adv. Appl. Probab.*, 6:260-290.

584

- 585 Chao, L. & Cox, E. C. 1983. Competition between high and low mutating strains of *Escherichia*  
586 *coli*. *Evolution*, 37:125-134.
- 587
- 588 Childs, D. Z., Metcalf, C. & Rees, M. 2010. Evolutionary bet-hedging in the real world:  
589 Empirical evidence and challenges revealed by plants. *Proc. R. Soc. B*, 277:3055-64.
- 590
- 591 Chuang, J. S., Rivoire, O. & Leibler, S. 2009. Simpson's paradox in a synthetic microbial system.  
592 *Science*, 323:272-275.
- 593
- 594 Clauss, M. & Venable, D. 2000. Seed germination in desert annuals: An empirical test of  
595 adaptive bet hedging. *Am. Nat.*, 155:168-186.
- 596
- 597 Colegrave, N. 2002. Sex releases the speed limit on evolution. *Nature*, 420:664-666.
- 598
- 599 Coombs, D., Gilchrist, M. A. & Ball, C. L. 2007. Evaluating the importance of within- and  
600 between-host selection pressures on the evolution of chronic pathogens. *Theor. Popul.*  
601 *Biol.*, 72:576-91.
- 602
- 603 Cooper, T. F. 2007. Recombination speeds adaptation by reducing competition between  
604 beneficial mutations in populations of *Escherichia coli*. *PLoS Biology*, 5:e225.
- 605

- 606 Costanzo, M., Vandersluis, B., Koch, E. N., Baryshnikova, A., Pons, C., Tan, G., Wang, W., et  
607 al. 2016. A global genetic interaction network maps a wiring diagram of cellular function.  
608 *Science*, 353:aaf1420.
- 609
- 610 Cvijović, I., Good, B. H., Jerison, E. R. & Desai, M. M. 2015. Fate of a mutation in a fluctuating  
611 environment. *Proc. Natl. Acad. Sci. USA*, 112:E5021-E5028.
- 612
- 613 Day, T. 2003. Virulence evolution and the timing of disease life-history events. *Trends Ecol.*  
614 *Evol.*, 18:113-118.
- 615
- 616 Day, T. & Gandon, S. 2007. Applying population-genetic models in theoretical evolutionary  
617 epidemiology. *Ecol. Lett.*, 10:876-888.
- 618
- 619 Day, T. & Read, A. F. 2016. Does high-dose antimicrobial chemotherapy prevent the evolution  
620 of resistance? *PLoS Comput. Biol.*, 12:e1004689.
- 621
- 622 Deitsch, K. W., Lukehart, S. A. & Stringer, J. R. 2009. Common strategies for antigenic  
623 variation by bacterial, fungal and protozoan pathogens. *Nature Rev. Microbiol.*, 7:493-  
624 503.
- 625
- 626 Dempster, E. R. 1955. Maintenance of genetic heterogeneity. *Cold Spring Harb. Symp. Quant.*  
627 *Biol.*, 20:25-31.
- 628

- 629 Denamur, E. & Matic, I. 2006. Evolution of mutation rates in bacteria. *Mol. Microbiol.*, 60:820-  
630 827.
- 631
- 632 Der, R., Epstein, C. & Plotkin, J. B. 2012. Dynamics of neutral and selected alleles when the  
633 offspring distribution is skewed. *Genetics*, 191:1331-1344.
- 634
- 635 Der, R., Epstein, C. L. & Plotkin, J. B. 2011. Generalized population models and the nature of  
636 genetic drift. *Theor. Popul. Biol.*, 80:80-99.
- 637
- 638 Desai, M. M. & Fisher, D. S. 2007. Beneficial mutation selection balance and the effect of  
639 linkage on positive selection. *Genetics*, 176:1759-98.
- 640
- 641 Diard, M., Garcia, V., Maier, L., Remus-Emsermann, M. N. P., Regoes, R. R., Ackermann, M. &  
642 Hardt, W.-D. 2013. Stabilization of cooperative virulence by the expression of an  
643 avirulent phenotype. *Nature*, 494:353-356.
- 644
- 645 Eshel, I. 1973. Clone-selection and optimal rates of mutation. *J Appl. Probab.*, 10:728-738.
- 646
- 647 Eshel, I. & Feldman, M. W. 1970. On the evolutionary effect of recombination. *Theor. Popul.*  
648 *Biol.*, 1:88-100.
- 649
- 650 Falconer, D. S. 1994. *Introduction to quantitative genetics*, Essex, England, Longman Scientific  
651 and Technical.

- 652
- 653 Frank, S. A. 1995. Mutual policing and repression of competition in the evolution of cooperative  
654 groups. *Nature*, 377:520-522.
- 655
- 656 Frank, Steven a. 2013. Microbial evolution: Regulatory design prevents cancer-like overgrowths.  
657 *Curr. Biol.*, 23:R343-R346.
- 658
- 659 Frank, S. A. & Slatkin, M. 1990. Evolution in a variable environment. *Am. Nat.*, 136:244-260.
- 660
- 661 Fraser, D. & Kaern, M. 2009. A chance at survival: Gene expression noise and phenotypic  
662 diversification strategies. *Mol. Microbiol.*, 71:1333-40.
- 663
- 664 Gerland, U. & Hwa, T. 2009. Evolutionary selection between alternative modes of gene  
665 regulation. *Proc. Natl. Acad. Sci. USA*, 106:8841-8846.
- 666
- 667 Gerrish, P. J. & Lenski, R. E. 1998. The fate of competing beneficial mutations in an asexual  
668 population. *Genetica*, 102:127.
- 669
- 670 Gilchrist, M. A. & Coombs, D. 2006. Evolution of virulence: Interdependence, constraints, and  
671 selection using nested models. *Theor. Popul. Biol.*, 69:145-53.
- 672
- 673 Gillespie, J. H. 1973. Natural selection with varying selection coefficients—a haploid model.  
674 *Genet. Res.*, 21:115-120.

- 675
- 676 Gillespie, J. H. 1974. Natural selection for within-generation variance in offspring number.  
677 *Genetics*, 76:601-606.
- 678
- 679 Giraud, A., Matic, I., Tenaillon, O., Clara, A., Radman, M., Fons, M. & Taddei, F. 2001. Costs  
680 and benefits of high mutation rates: Adaptive evolution of bacteria in the mouse gut.  
681 *Science*, 291:2606-8.
- 682
- 683 Goddard, M. R., Godfray, H. C. J. & Burt, A. 2005. Sex increases the efficacy of natural  
684 selection in experimental yeast populations. *Nature*, 434:636-640.
- 685
- 686 Good, B. H. & Desai, M. M. 2016. Evolution of mutation rates in rapidly adapting asexual  
687 populations. *Genetics*, 204:1249-66.
- 688
- 689 Gore, J., Youk, H. & Van Oudenaarden, A. 2009. Snowdrift game dynamics and facultative  
690 cheating in yeast. *Nature*, 459:253-6.
- 691
- 692 Graves, C. J., Ros, V. I., Stevenson, B., Sniegowski, P. D. & Brisson, D. 2013. Natural selection  
693 promotes antigenic evolvability. *PLoS Pathog.*, 9:e1003766.
- 694
- 695 Gremer, J. R. & Venable, D. L. 2014. Bet hedging in desert winter annual plants: Optimal  
696 germination strategies in a variable environment. *Ecol. Lett.*, 17:380-7.
- 697



- 698 Haigh, J. 1978. The accumulation of deleterious genes in a population—Muller's ratchet. *Theor.*  
699 *Popul. Biol.*, 14:251-267.  
700
- 701 Haldane, J. B. S. 1927. A mathematical theory of natural and artificial selection. Part V:  
702 Selection and mutation. *Proc. Camb. Phil. Soc*, 23:838-844.  
703
- 704 Hamilton, W. D. 1964. The genetical evolution of social behaviour. I. *Theor. Popul. Biol.*, 7:1-  
705 16.  
706
- 707 Hamilton, W. D., Axelrod, R. & Tanese, R. 1990. Sexual reproduction as an adaptation to resist  
708 parasites (a review). *Proc. Natl. Acad. Sci. USA*, 87:3566-3573.  
709
- 710 Hopper, K. R. 1999. Risk-spreading and bet-hedging in insect population biology. *Annu. Rev.*  
711 *Entomol.*, 44:535-560.  
712
- 713 Huijben, S., Bell, A. S., Sim, D. G., Tomasello, D., Mideo, N., Day, T. & Read, A. F. 2013.  
714 Aggressive chemotherapy and the selection of drug resistant pathogens. *PLoS Pathog.*,  
715 9:e1003578.  
716
- 717 Jones, S. E. & Lennon, J. T. 2010. Dormancy contributes to the maintenance of microbial  
718 diversity. *Proc. Natl. Acad. Sci. USA*, 107:5881-6.  
719

- 720 Kawashima, Y., Pfafferott, K., Frater, J., Matthews, P., Payne, R., Addo, M., Gatanaga, H., et al.  
721 2009. Adaptation of HIV-1 to human leukocyte antigen class I. *Nature*, 458:641-645.  
722
- 723 Kimura, M. 1962. On the probability of fixation of mutant genes in a population. *Genetics*,  
724 47:713-719.  
725
- 726 King, O. D. & Masel, J. 2007. The evolution of bet-hedging adaptations to rare scenarios. *Theor.*  
727 *Popul. Biol.*, 72:560-575.  
728
- 729 Kondrashov, A. S. 1988. Deleterious mutations and the evolution of sex. *Nature*, 336:435-440.  
730
- 731 Koschwanez, J. H., Foster, K. R. & Murray, A. W. 2013. Improved use of a public good selects  
732 for the evolution of undifferentiated multicellularity. *eLife*, 2:e00367.  
733
- 734 Kryazhimskiy, S., Rice, D. P., Jerison, E. R. & Desai, M. M. 2014. Global epistasis makes  
735 adaptation predictable despite sequence-level stochasticity. *Science*, 344:1519-1522.  
736
- 737 Kussell, E. & Leibler, S. 2005. Phenotypic diversity, population growth, and information in  
738 fluctuating environments. *Science*, 309:2075-2078.  
739
- 740 Lang, G. I., Rice, D. P., Hickman, M. J., Sodergren, E., Weinstock, G. M., Botstein, D. & Desai,  
741 M. M. 2013. Pervasive genetic hitchhiking and clonal interference in forty evolving yeast  
742 populations. *Nature*, 500:571-4.

- 743
- 744 Leclerc, J. E., Li, B., Payne, W. L. & Cebula, T. A. 1996. High mutation frequencies among  
745 *Escherichia coli* and *Salmonella* pathogens. *Science*, 274:1208-11.
- 746
- 747 Lehmann, L., Mullon, C., Akçay, E. & Van Cleve, J. 2016. Invasion fitness, inclusive fitness,  
748 and reproductive numbers in heterogeneous populations. *Evolution*, 70:1689-1702.
- 749
- 750 Levin, B. R. & Bull, J. J. 1994. Short-sighted evolution and the virulence of pathogenic  
751 microorganisms. *Trends Microbiol.*, 2:76-81.
- 752
- 753 Levins, R. 1968. *Evolution in changing environments: Some theoretical explorations*, Princeton,  
754 NJ, Princeton University Press.
- 755
- 756 Levy, S. F., Blundell, J. R., Venkataram, S., Petrov, D. A., Fisher, D. S. & Sherlock, G. 2015.  
757 Quantitative evolutionary dynamics using high-resolution lineage tracking. *Nature*,  
758 519:181-6.
- 759
- 760 Levy, S. F., Ziv, N. & Siegal, M. L. 2012. Bet hedging in yeast by heterogeneous, age-correlated  
761 expression of a stress protectant. *PLoS Biol.*, 10:e1001325.
- 762
- 763 Lewontin, R. C. & Cohen, D. 1969. On population growth in a randomly varying environment.  
764 *Proc. Natl. Acad. Sci. USA*, 62:1056-1060.
- 765

- 766 Livnat, A. & Papadimitriou, C. H. 2016. Sex as an algorithm: The theory of evolution under the  
767 lens of computation. *Commun. ACM*, 59:84-93.  
768
- 769 Luo, S. 2014. A unifying framework reveals key properties of multilevel selection. *Theor. Popul.*  
770 *Biol.*, 341:41-52.  
771
- 772 Lynch, M. 2007. The frailty of adaptive hypotheses for the origins of organismal complexity.  
773 *Proc. Natl. Acad. Sci. USA*, 104:8597-8604.  
774
- 775 Masel, J., King, Oliver d. & Maughan, H. 2007. The loss of adaptive plasticity during long  
776 periods of environmental stasis. *Am. Nat.*, 169:38-46.  
777
- 778 Matic, I., Radman, M., Taddei, F., Picard, B., Doit, C., Bingen, E., Denamur, E., et al. 1997.  
779 Highly variable mutation rates in commensal and pathogenic *Escherichia coli*. *Science*,  
780 277:1833-1834.  
781
- 782 Maynard Smith, J. 1964. Group selection and kin selection. *Nature*, 201:1145-1147.  
783
- 784 Maynard Smith, J. 1978. *The evolution of sex*, Cambridge Univ Press.  
785
- 786 Maynard Smith, J. 1982. *Evolution and the theory of games*, Cambridge University Press.  
787
- 788 Maynard Smith, J. & Price, G. 1973. The logic of animal conflict. *Nature*, 246:15.

- 789
- 790 McDonald, M. J., Rice, D. P. & Desai, M. M. 2016. Sex speeds adaptation by altering the  
791 dynamics of molecular evolution. *Nature*, 531:233-236.
- 792
- 793 Menu, F., Roebuck, J.-P. & Viala, M. 2000. Bet-hedging diapause strategies in stochastic  
794 environments. *Am. Nat.*, 155:724-734.
- 795
- 796 Meyers, L. A. & Bull, J. J. 2002. Fighting change with change: Adaptive variation in an  
797 uncertain world. *Trends Ecol. Evol.*, 17:551-557.
- 798
- 799 Mideo, N., Alizon, S. & Day, T. 2008. Linking within- and between-host dynamics in the  
800 evolutionary epidemiology of infectious diseases. *Trends Ecol. Evol.*, 23:511-7.
- 801
- 802 Morran, L. T., Schmidt, O. G., Gelarden, I. A., Parrish, R. C. & Lively, C. M. 2011. Running  
803 with the red queen: Host-parasite coevolution selects for biparental sex. *Science*,  
804 333:216-218.
- 805
- 806 Mossman, J. A., Biancani, L. M., Zhu, C.-T. & Rand, D. M. 2016. Mitonuclear epistasis for  
807 development time and its modification by diet in *Drosophila*. *Genetics*, 203:463-84.
- 808
- 809 Moxon, E. R., Rainey, P. B., Nowak, M. A. & Lenski, R. E. 1994. Adaptive evolution of highly  
810 mutable loci in pathogenic bacteria. *Curr. Biol.*, 4:24-33.
- 811

- 812 Mulder, D. T. & Coombes, B. K. 2013. Infection biology: Cheats never prosper. *Nature*,  
813 494:321-322.  
814
- 815 Muller, H. J. 1964. The relation of recombination to mutational advance. *Mutat. Res.*, 106:2-9.  
816
- 817 Nunney, L. 1989. The maintenance of sex by group selection. *Evolution*, 43:245-257.  
818
- 819 Nunney, L. 1999a. Lineage selection and the evolution of multistage carcinogenesis. *Proc. R.*  
820 *Soc. B*, 266:493-498.  
821
- 822 Nunney, L. 1999b. Lineage selection: Natural selection for long-term benefit. *In: Keller, L. (ed.)*  
823 *Levels of selection in evolution*. Princeton, NJ: Princeton University Press.  
824
- 825 Orr, H. A. 2009. Fitness and its role in evolutionary genetics. *Nature Rev. Genet.*, 10:531-9.  
826
- 827 Philippi, T. & Seger, J. 1989. Hedging one's evolutionary bets, revisited. *Trends Ecol. Evol.*,  
828 4:41-4.  
829
- 830 Phillips, P. C. 1998. The language of gene interaction. *Genetics*, 149:1167-1171.  
831
- 832 Pigliucci, M. 2008. Is evolvability evolvable? *Nature Rev. Genet.*, 9:75-82.  
833

- 834 Rainey, P. B. & Rainey, K. 2003. Evolution of cooperation and conflict in experimental bacterial  
835 populations. *Nature*, 425:72-74.  
836
- 837 Ratnieks, F. L. & Visscher, P. K. 1989. Worker policing in the honeybee. *Nature*, 342:796-797.  
838
- 839 Raynes, Y., Halstead, A. L. & Sniegowski, P. D. 2014. The effect of population bottlenecks on  
840 mutation rate evolution in asexual populations. *J. Evol. Biol.*, 27:161-169.  
841
- 842 Read, A. F., Day, T. & Huijben, S. 2011. The evolution of drug resistance and the curious  
843 orthodoxy of aggressive chemotherapy. *Proc. Natl. Acad. Sci. USA*, 108:10871-10877.  
844
- 845 Simon, B., Fletcher, J. A. & Doebeli, M. 2013. Towards a general theory of group selection.  
846 *Evolution*, 67:1561-1572.  
847
- 848 Sniegowski, P. D., Gerrish, P. J., Johnson, T. & Shaver, A. 2000. The evolution of mutation  
849 rates: Separating causes from consequences. *Bioessays*, 22:1057-1066.  
850
- 851 Sniegowski, P. D., Gerrish, P. J. & Lenski, R. E. 1997. Evolution of high mutation rates in  
852 experimental populations of *E. coli*. *Nature*, 387:703-705.  
853
- 854 Sniegowski, P. D. & Murphy, H. A. 2006. Evolvability. *Curr. Biol.*, 16:R831-R834.  
855

- 856 Stearns, S. C. 2000. Daniel Bernoulli (1738): Evolution and economics under risk. *J. Biosci.*,  
857 25:221-8.  
858
- 859 Szathmary, E. & Maynard Smith, J. 1995. The major evolutionary transitions. *Nature*, 374:227-  
860 232.  
861
- 862 Takahata, N., Ishii, K. & Matsuda, H. 1975. Effect of temporal fluctuation of selection  
863 coefficient on gene frequency in a population. *Proc. Natl. Acad. Sci. USA*, 72:4541-4545.  
864
- 865 Traulsen, A. & Hauert, C. 2009. Stochastic evolutionary game dynamics. *In*: Schuster, H. G.  
866 (ed.) *Reviews of nonlinear dynamics and complexity*. Weinheim, Germany: Wiley-VCH  
867 Verlag GmbH & Co.  
868
- 869 Traulsen, A. & Nowak, M. A. 2006. Evolution of cooperation by multilevel selection. *Proc.*  
870 *Natl. Acad. Sci. USA*, 103:10952-10955.  
871
- 872 Travisano, M. & Velicer, G. J. 2004. Strategies of microbial cheater control. *Trends Microbiol.*,  
873 12:72-78.  
874
- 875 Turner, P. E. & Chao, L. 1999. Prisoner's dilemma in an RNA virus. *Nature*, 398:441-443.  
876
- 877 Van Valen, L. 1973. A new evolutionary law. *Evolutionary theory*, 1:1-30.  
878



- 879 Velicer, G. J., Kroos, L. & Lenski, R. E. 2000. Developmental cheating in the social bacterium  
880 *Myxococcus xanthus*. *Nature*, 404:598-601.  
881
- 882 Via, S., Gomulkiewicz, R., De Jong, G., Scheiner, S. M., Schlichting, C. D. & Van Tienderen, P.  
883 H. 1995. Adaptive phenotypic plasticity: Consensus and controversy. *Trends Ecol. Evol.*,  
884 10:212-7.  
885
- 886 Wang, X., Fu, A. Q., Mcnerney, M. E. & White, K. P. 2014. Widespread genetic epistasis among  
887 cancer genes. *Nature communications*, 5.  
888
- 889 Weinreich, D. M., Lan, Y., Wylie, C. S. & Heckendorn, R. B. 2013. Should evolutionary  
890 geneticists worry about high order epistasis? *Current Opinion in Development and*  
891 *Genetics*, 23:700-707.  
892
- 893 Williams, G. C. 1966. *Adaptation and natural selection: A critique of some current evolutionary*  
894 *thought*, Princeton university press.  
895
- 896 Wylie, C. S., Ghim, C. M., Kessler, D. A. & Levine, H. 2009. The fixation probability of rare  
897 mutators in finite asexual populations. *Genetics*, 181:1595-1602.  
898

899 *Sidebar 1 – What is a lineage? (Typeset near ‘Introduction’)*

900 We define a lineage as the full genealogy of descendent copies of an allele starting from the  
901 original copy and ending at its long-term fate: extinction, fixation, or maintenance as a stable  
902 polymorphism in the population. A traditional approach in population genetics has been to  
903 describe the long-term evolutionary fate of a mutant allele influencing some biological trait  
904 under the combined influence of evolutionary processes like mutation, genetic drift, migration,  
905 and natural selection. Using analytical approaches from stochastic process theory, this work  
906 seeks to calculate the probability that such an allele ultimately reaches a frequency of one, or  
907 achieves fixation, in the population. This approach places emphasis not solely on the individual  
908 reproductive process but also on the long-term fate of a genetic lineage carrying the mutation. It  
909 therefore captures a much larger class of phenomena where fitness may not be directly affected  
910 among individual carriers of an allele but the allele instead influences the statistical properties of  
911 a lineage (Wylie et al., 2009). Our focus will be primarily on lineage of asexual haploid lineages,  
912 which are easier to analyze and depict. However, the approach and definition of a lineage given  
913 here extends naturally to sexual diploid organisms.

914

915 *Sidebar 2 – Geometric mean fitness (Typeset near beginning of ‘Lineage selection’)*

916 A widely appreciated result regarding adaptations to varying environments is the principle that  
917 natural selection will favor traits based on their geometric mean fitness. When reproductive  
918 success changes between generations, natural selection favors traits that increase the long-term  
919 geometric mean fitness (GMF). Reflecting the multiplicative nature of reproduction, GMF is the  
920 product of fitness in each generation, raised to the reciprocal of the number of generations.

921 Algebraically,  $GMF = (\prod_{t=1}^n w_t)^{1/n}$ , where  $w_t$  is the Wrightian fitness of a trait in generation  $t$ .

922 The same quantity can be expressed as a linear average over the natural log of this fitness value,

923  $GMF = \exp(\frac{1}{n} \sum_{t=1}^n \log(w_t))$ . In practice, approximations are used such as  $GMF \approx \mu - \sigma^2/\mu$ ,

924 where  $\mu$  is the arithmetic mean fitness and  $\sigma^2$  is the variance in fitness. This formula explicates  
925 the fact that natural selection favors increases in mean fitness, but also decreases in the variance  
926 of fitness. This implies that natural selection can be risk averse, favoring alleles with lower  
927 variance in fitness even at the expense of decreasing fitness on average.

928

929 *Sidebar 3 – Evolutionary game theory (Typeset near end of ‘Lineage selection’ or beginning of*  
930 *‘Limitations of Fitness averages’)*

931

932 Evolutionary game theory (Maynard Smith, 1982) analyzes an interaction among a set of  
933 competing alleles or “strategies” and summarizes their effect in a matrix representing the fitness  
934 payoff of all pairwise competitions among competitors. Such a framework is most useful in the  
935 context of frequency dependent selection, where the fitness effects of an allele are not easily  
936 summarized by a constant selection coefficient. Such a framework provides a natural way to  
937 determine whether a new allele starting from a single copy will tend to increase in frequency or  
938 “invade” a population that is fixed for an alternative allele. This leads to the concept of an  
939 evolutionarily stable strategy or ESS, which is defined as a strategy or allele that cannot be  
940 invaded by any alternative strategy starting at an initially small frequency. The ability of an allele  
941 to invade, or invasion fitness, is a generalization of the notion of a selection coefficient to the  
942 case of frequency dependent selection (Lehmann et al., 2016). While there are notable exceptions  
943 (Traulsen and Nowak, 2006, Traulsen and Hauert, 2009), game theoretic models are typically  
944 deterministic and describe the tendency for allele frequency change but not the statistical  
945 properties of lineages in finite populations.

946 **Glossary of terms** (*To appear adjacent to first use of each term or phrase*)

947

948 **Lineage selection:** Competition between two or more lineages in population.

949

950 **Offspring distribution:** A discrete probability distribution that captures the stochasticity in an  
951 individual organism's reproductive success

952

953 **Cheater:** An organism that produces little or no public good but utilizes those goods produced  
954 by other organisms.

955

956 **Frequency dependent selection:** A model in which the fitness of an allele depends on its  
957 frequency in the population as a consequence of interactions between organisms.

958

959 **Epistasis:** The phenotypic effect of a mutation varies with genetic context.

960

961 **Modifier loci:** Loci responsible for genetic properties of a genome, such as mutation rate,  
962 recombination rate and mutational robustness.

963

964 **Indirect selection:** Selection acting on a modifier locus mediated by its effect on the fitness at  
965 other loci in the genome. Indirect selection models commonly assume that the modifier is  
966 intrinsically selectively neutral, and require that recombination rates are low.

967

968 **Clonal interference:** Competition between mutational independent lineages, each carrying one  
969 or more beneficial mutations. Clonal interference is common in asexual populations in which the  
970 beneficial mutation rate is larger than approximately the reciprocal of the population size.

971

972 **Genetic drift:** stochastic variation in allele frequency as a consequence of stochasticity in  
973 reproduction inherent in finite populations.

974

975 **Drift barrier:** the limit on the efficiency of natural selection imposed by genetic drift.

976

977 **Figure Captions**

978

979 **Figure 1. Variability in fitness across a lineage in diverse models.** The defining feature of  
980 lineage selection is the presence of variability across a lineage either among contemporary  
981 individuals (vertical axis) or between individuals in time (horizontal axis). Genealogies are  
982 shown for two competing allelic lineages indicated by circles. The focal lineage is shaded yellow  
983 and the wild-type lineage is shaded black. **A.** Lineage carrying a beneficial allele (yellow) rising  
984 to fixation under the classical scenario of lineage invariance. **B.** Lineage carrying an allele that  
985 alternates from beneficial to deleterious in a variable environment. Contemporary individuals  
986 share an identical fitness, and hence an identical selection coefficient, but this quantity changes  
987 between generations. **C.** Evolution of a mutator lineage that experiences increased rates of both  
988 deleterious (red dots) and beneficial (grey background) mutations. Fitness in the lineage varies  
989 both among contemporary individuals and between generations. **D.** A cooperative lineage under  
990 a group selection model. Within-group selective pressures cause the allele to be disfavored over  
991 short timescales. Groups with more cooperative alleles tend to displace other groups over longer  
992 timescales (shown with solid grey lines).

993

994 **Figure 2. Limitations of fitness averages in finite populations.** Evolution in a periodic  
995 environment results in four distinct regimes characterized by the relative timescale of natural  
996 selection ( $1/s$ ) and environmental change ( $\tau$ ). Simulation results of the model described by  
997 Cvijović et al. (2015) are shown in blue and the expected change of an allele with the same  
998 average fitness effect in a constant environment is shown in red. Unless otherwise noted,  
999 simulations are conducted with an average selection coefficient of 0.05 and a population size of  
1000 100,000. Selection coefficients are held constant at  $\pm 0.06$  within each environment while the  
1001 timescale of environmental change is varied (beneficial environmental epochs are shaded grey  
1002 while deleterious epochs are unshaded). **A.** When the environment changes fast relative to  
1003 changes in allele frequency (small  $\tau$ ), the average change in allele frequency is well  
1004 approximated by a fitness average like geometric mean fitness. **B.** When the environment  
1005 changes slower than the time of fixation of an allele (large  $\tau$ ), mutations tend to arise and fix all  
1006 in the same environment, regardless of their average fitness effect. **C.** In infinite populations,  
1007 averages like the geometric mean fitness are accurate regardless of the timescale of  
1008 environmental change. This is an artifact of the fact that, in the absence of genetic drift, allele  
1009 frequencies become arbitrarily close to zero or one but never permanently achieve fixation or  
1010 extinction. **D.** Average fitness breaks down when large fluctuations in allele frequency occur on  
1011 a similar timescale to environmental change (intermediate  $\tau$ ). This is due to the amplification of  
1012 fluctuations by genetic drift whenever alleles reach very high or very low frequencies (Cvijović  
1013 et al. 2015). Note that genetic drift occurring as the frequency of the allele approaches 1 causes it  
1014 to respond only modestly to the second deleterious epoch. The allele subsequently achieved  
1015 fixation much sooner than would be expected on the basis of its average fitness effect.  
1016



1017 **Table 1.** Sources of variability across a lineage and associated adaptations (*Typeset near*  
 1018 *'Introduction'*)

|                          | <b>Basis of variability in fitness</b> |                         |                       |
|--------------------------|----------------------------------------|-------------------------|-----------------------|
|                          | <b>Environmental</b>                   | <b>Genetic</b>          | <b>Social</b>         |
| <b>Specific examples</b> | Spatial variation                      | Sex                     | Kin selection         |
|                          | Temporal variation                     | Mutation                | Multi-level selection |
|                          |                                        | Clonal interference     |                       |
|                          |                                        | Epistasis               |                       |
| <b>Adaptations</b>       | Bet-hedging                            | Sex/recombination       | Cooperation           |
|                          | Phenotypic plasticity                  | Mutation rate modifiers | Policing              |
|                          |                                        | Evolvability            |                       |

1019

1020 **Figure 1**

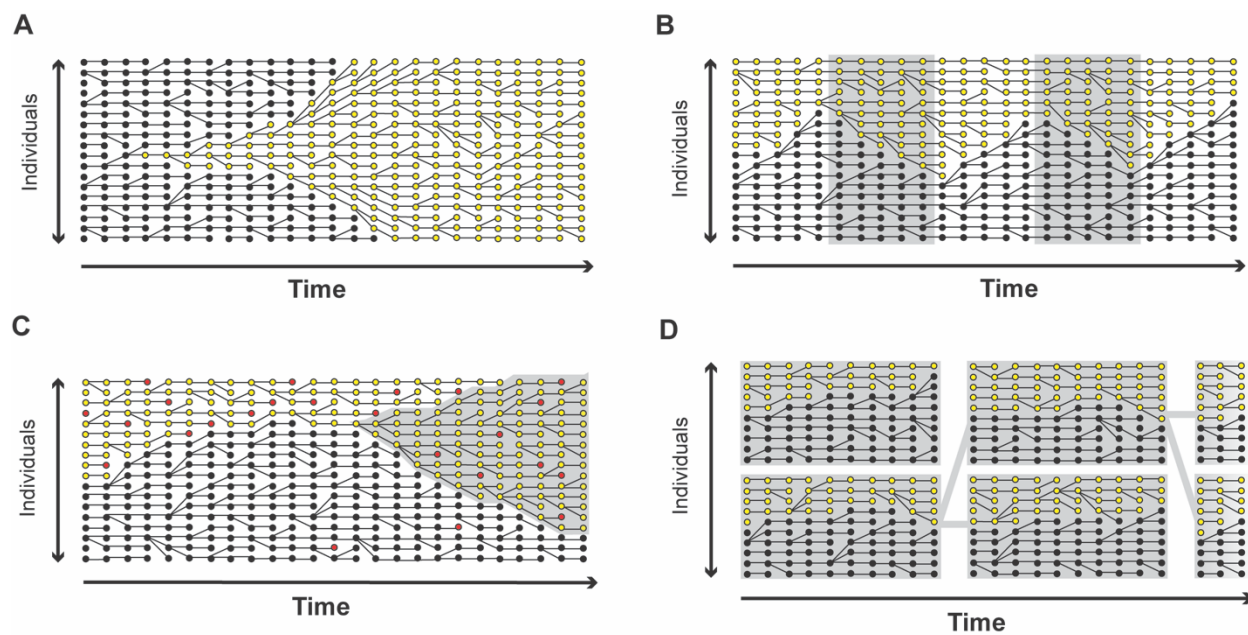

1021

1022

1023 **Figure 2**

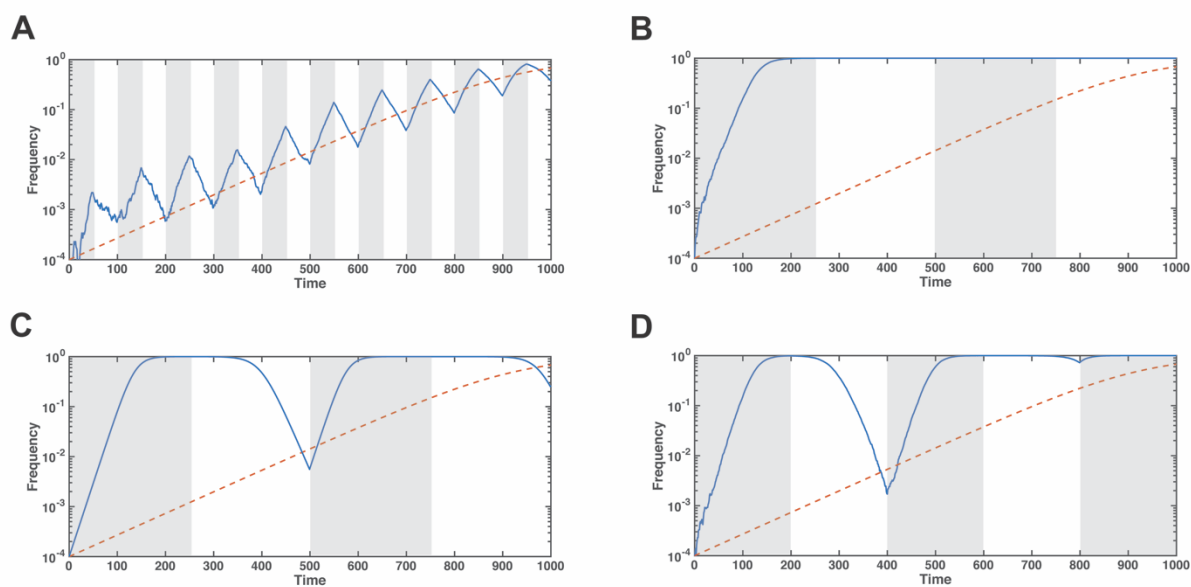

1024
